# Supplementary material for: Twofold role of calcined hydrotalcites in the degradation of methyl parathion pesticide
Source: PubMed Central journal article supplement (PMC3148045; doi:10.3762/bjnano.2.11), 2011-02-09

## **Supporting Information File 2**

**for**

### **Twofold role of calcined hydrotalcites in the degradation of methyl parathion pesticide**

Alvaro Sampieri<sup>1\*</sup>, Geolar Fetter<sup>2</sup>, María Elena Villafuerte-Castrejon<sup>3</sup>, Adriana Tejeda-Cruz<sup>3</sup> and Pedro Bosch<sup>3</sup>

Address: <sup>1</sup>Benemérita Universidad Autónoma de Puebla, Facultad de Ingeniería Química, Av. San Claudio, Ciudad Universitaria, 72570, Puebla, PUE, Mexico. Phone: (+52) 22222-95500 ext. 7250; <sup>2</sup>Benemérita Universidad Autónoma de Puebla, Facultad de Ciencias Químicas, Av. San Claudio, Ciudad Universitaria, 72570, Puebla, PUE, Mexico and <sup>3</sup>Universidad Nacional Autónoma de México, Instituto de Investigaciones en Materiales, A.P. 70360, Ciudad Universitaria, 04510 México, D.F., Mexico

Email: Alvaro Sampieri\* - asamcr@yahoo.com; Geolar Fetter - geolarfetter@yahoo.com.mx; María Elena Villafuerte-Castrejon - mevc@servidor.unam.mx; Adriana Tejeda-Cruz - tejeda@iim.unam.mx; Pedro Bosch - croqcroq@hotmail.com

\* Corresponding author

### **X-ray diffractograms of dried and calcined hydrotalcites**

The X-ray diffractograms of dried (70 °) and calcined (500 °C) hydrotalcites, respectively, are shown in the following figures:

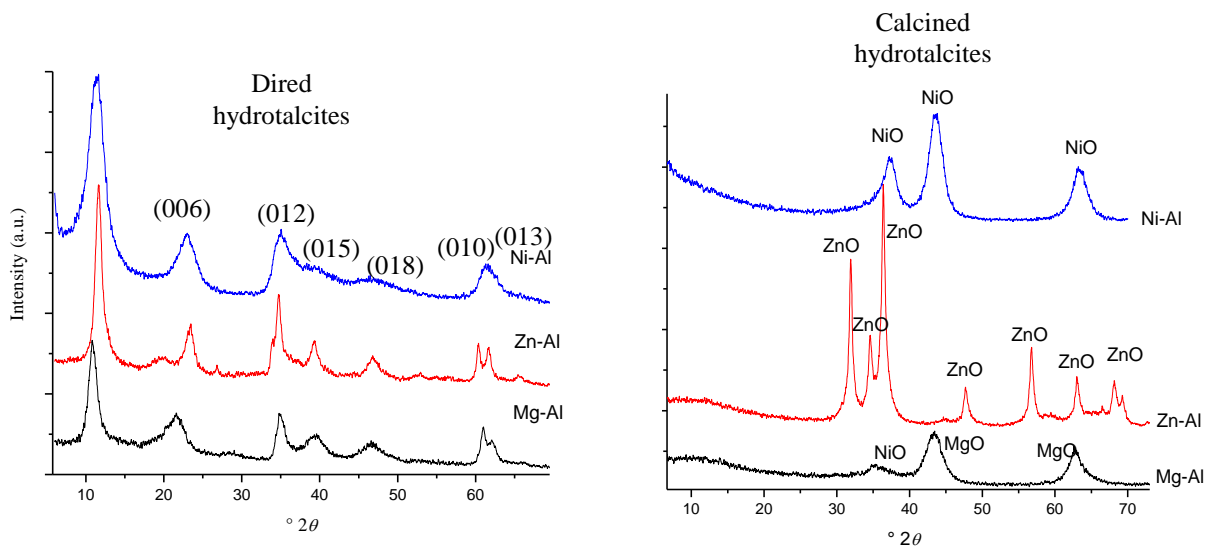

Supplement: Beilstein_J_Nanotechnol-02-99-s002.pdf [file Beilstein_J_Nanotechnol-02-99-s002.pdf]
